# Supplementary material
Source: ML conference proceedings conference paper supplement (https://aclanthology.org/2024.semeval-1.238)

{prompt}

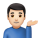

{human-written text}

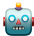

{machine-gen. text}

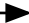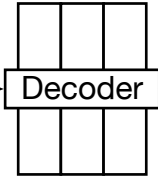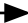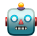

{machine-gen. text}

Supplement: SupplementaryMaterial [file 2024.semeval-1.238.SupplementaryMaterial.zip]

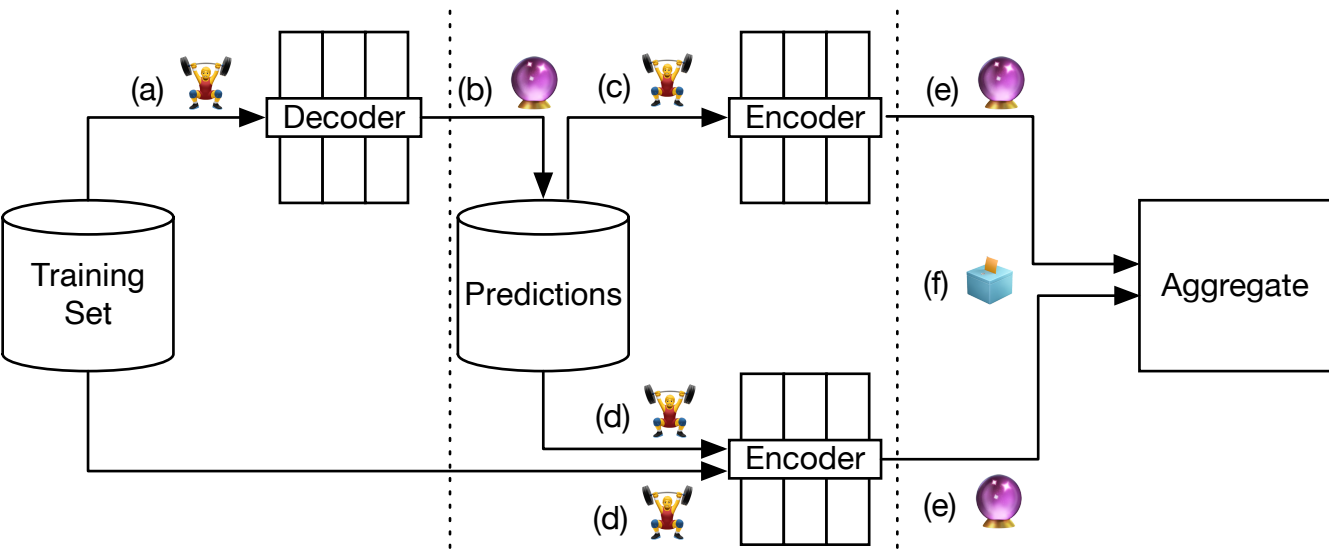

Supplement: SupplementaryMaterial [file 2024.semeval-1.238.SupplementaryMaterial.zip]

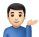

{human-written text}

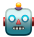

{machine-gen. text}

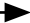

Encoder

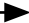

|   |   |   |   |
|---|---|---|---|
| 0 | 0 | 0 | 0 |
| 1 | 1 | 1 | 1 |

Supplement: SupplementaryMaterial [file 2024.semeval-1.238.SupplementaryMaterial.zip]

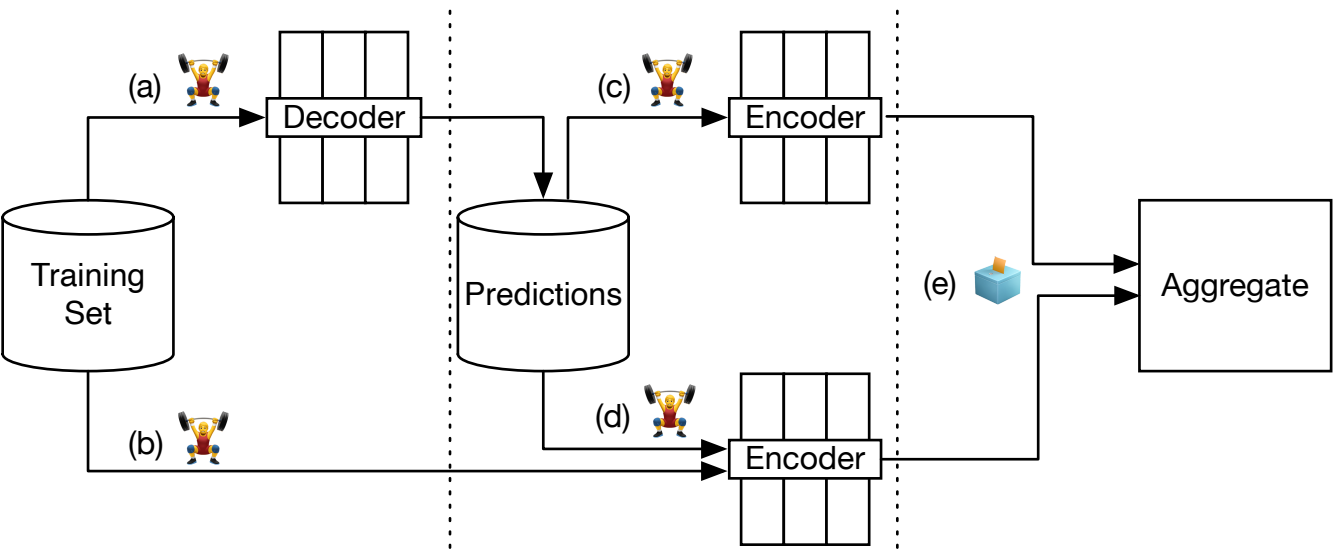

Supplement: SupplementaryMaterial [file 2024.semeval-1.238.SupplementaryMaterial.zip]
